# Supplementary material for: Cell Type-Specific p38δ Targeting Reveals a Context-, Stage-, and Sex-Dependent Regulation of Skin Carcinogenesis
Source: MDPI journal article supplement (doi:10.3390/ijms20071532), 2019-03-27
Supplement: s1 [file s1]

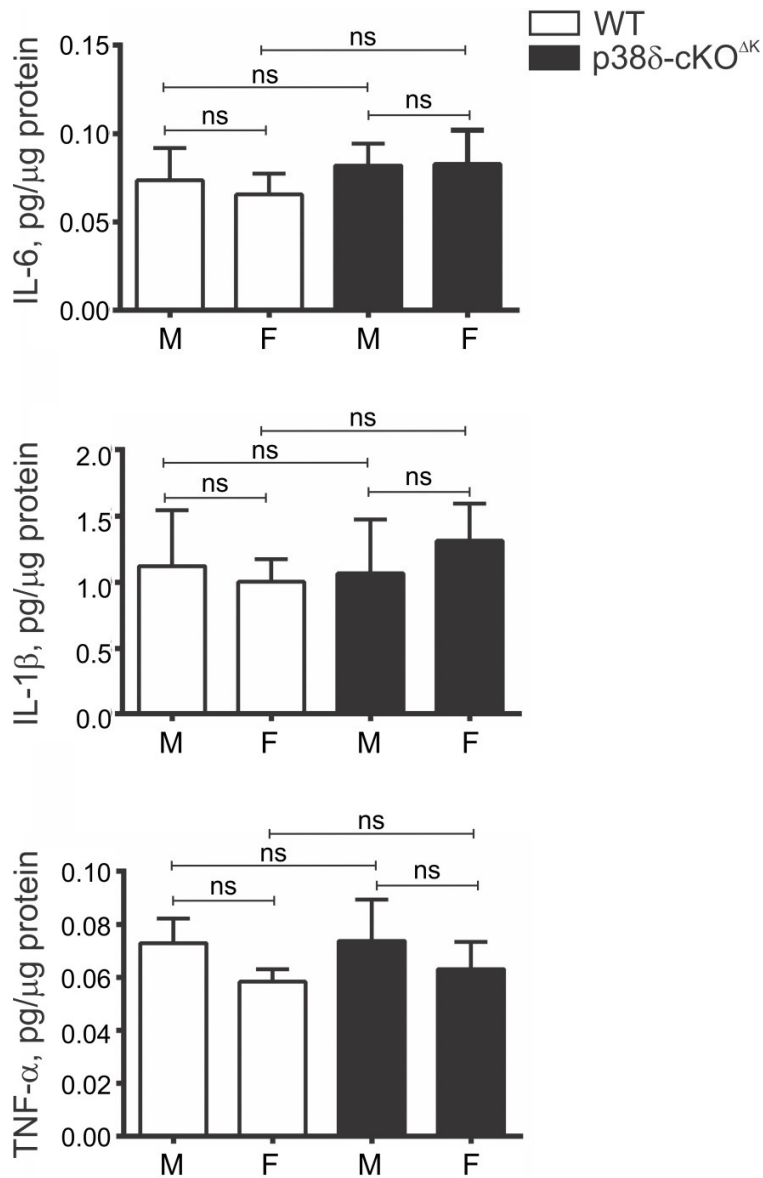

**Supplementary Figure S1.** Analysis of sex-specific inflammatory cytokine expression in WT and p38δ-cKO<sup>ΔK</sup> male (WT males: n = 11, cKO males: n = 7) and female (WT females: n = 9; cKO females: n = 10) mouse skin subjected to a short-term DMBA/TPA regimen as detailed in the Materials and Methods. Total skin lysates were isolated from full-thickness dorsal skin 2 h after the final TPA treatment, and levels of protein expression of the indicated cytokines were analyzed using ELISA. Results are shown as mean ± SE. ns, not significant; M, males; F, females.

### Supplementary Table S1

**Tumor latency (time to first tumor) did not differ significantly between the WT and p38 $\delta$ -cKO <sup>$\Delta$ K</sup> genotypes.**

We used one-sided log-rank tests to compare tumor latency between genotypes.

|                                                             | WT             | p38 $\delta$ -cKO <sup><math>\Delta</math>K</sup> |
|-------------------------------------------------------------|----------------|---------------------------------------------------|
| <b>Number of animals</b>                                    | 19             | 21                                                |
| <b>Median time to tumor (weeks)</b>                         | 22             | 23                                                |
| <b>95% confidence interval for median</b>                   | 18, 25         | 18, 25                                            |
| <b>Mean time to tumor <math>\pm</math> s.e.</b>             | 22.8 $\pm$ 1.6 | 23.4 $\pm$ 1.5                                    |
| <b>Number of tumor-free animals at the end of study (%)</b> | 1              | 2                                                 |
|                                                             |                |                                                   |
| <b>Log-rank p-values</b>                                    |                |                                                   |
|                                                             | <b>WT vs.</b>  | 0.3520                                            |

## Supplementary Tables S2

### Tumor volume comparisons between WT and p38 $\delta$ -cKO $\Delta^K$ genotypes.

(In the analyses below, the tumor was treated as the unit of analysis.)

- a) The ratios of mean individual tumor volumes in female mice were compared between the WT and p38 $\delta$ -cKO $\Delta^K$  genotypes at the indicated week after detection during TPA promotion stage; ns, not significant.

| Week after detecting individual tumors in females during TPA promotion | Ratio of mean tumor volumes of genotypes (p38 $\delta$ -cKO $\Delta^K$ / WT) | Significance by Mann-Whitney test (one-sided) | p-value       |
|------------------------------------------------------------------------|------------------------------------------------------------------------------|-----------------------------------------------|---------------|
| 1                                                                      | 1.2                                                                          | ns                                            | 0.1086        |
| 2                                                                      | 1.3                                                                          | ns                                            | 0.2791        |
| 3                                                                      | 1.0                                                                          | ns                                            | 0.4024        |
| 4                                                                      | 2.4                                                                          | ns                                            | 0.0955        |
| 5                                                                      | 0.8                                                                          | ns                                            | 0.3141        |
| 6                                                                      | 1.1                                                                          | ns                                            | 0.2051        |
| 7                                                                      | <b>10.6</b>                                                                  | <b>**</b>                                     | <b>0.0079</b> |
| 8                                                                      | <b>10.9</b>                                                                  | <b>*</b>                                      | <b>0.0357</b> |
| 9                                                                      | 13.0                                                                         | ns                                            | 0.0667        |

- b) Tumor Volume, Mean  $\pm$  s.e. There were no significant differences between the WT and p38 $\delta$ -cKO $\Delta^K$  genotypes for any group at any time point.

|                 | WT                          |                             |                             | p38 $\delta$ -cKO $\Delta^K$ |                            |                             |
|-----------------|-----------------------------|-----------------------------|-----------------------------|------------------------------|----------------------------|-----------------------------|
|                 | M                           | F                           | M&F                         | M                            | F                          | M&F                         |
| <b>25 weeks</b> | 8.7 $\pm$ 2.4<br>(n = 15)   | 12.6 $\pm$ 4.6<br>(n = 4)   | 9.5 $\pm$ 2.1<br>(n = 19)   | 6.5 $\pm$ 1.8<br>(n = 20)    | 62.2 $\pm$ 26.6<br>(n = 9) | 23.8 $\pm$ 9.4<br>(n = 29)  |
| <b>40 weeks</b> | 28.4 $\pm$ 7.4<br>(n = 16)  | 45.1 $\pm$ 17.7<br>(n = 12) | 35.6 $\pm$ 8.6<br>(n = 28)  | 29.1 $\pm$ 11.7<br>(n = 14)  | 66.4 $\pm$ 34.4<br>(n = 7) | 41.5 $\pm$ 13.9<br>(n = 21) |
| <b>51 weeks</b> | 72.4 $\pm$ 22.3<br>(n = 16) | 72.6 $\pm$ 22.3<br>(n = 12) | 72.5 $\pm$ 15.6<br>(n = 28) | 60.3 $\pm$ 21.7<br>(n = 16)  | 51.7 $\pm$ 20.9<br>(n = 6) | 58.0 $\pm$ 16.6<br>(n = 22) |

c) Mann-Whitney p-values (one-sided) for tumor volumes listed in (b).

|                 | <b>M</b>          | <b>F</b>          | <b>M&amp;F</b>    |
|-----------------|-------------------|-------------------|-------------------|
|                 | <b>WT vs. cKO</b> | <b>WT vs. cKO</b> | <b>WT vs. cKO</b> |
| <b>25 weeks</b> | 0.2167            | 0.2437            | 0.4790            |
| <b>40 weeks</b> | 0.3935            | 0.2914            | 0.4398            |
| <b>51 weeks</b> | 0.2796            | 0.2130            | 0.1306            |

d) We used one-sided Mann-Whitney tests to compare tumor volumes (tumor volume, mean  $\pm$  s.e) of males and females for each genotype, at each time point. For p38 $\delta$ -cKO $\Delta^K$ , mean tumor volume was significantly increased for females compared to males at week 25 (see bolded text).

Tumor Volume, Mean  $\pm$  s.e.

|                 | <b>WT</b>                   |                             |                | <b>p38<math>\delta</math>-cKO<math>\Delta^K</math></b> |                                                     |                             |
|-----------------|-----------------------------|-----------------------------|----------------|--------------------------------------------------------|-----------------------------------------------------|-----------------------------|
|                 | <b>M</b>                    | <b>F</b>                    | <b>p-value</b> | <b>M</b>                                               | <b>F</b>                                            | <b>p-value</b>              |
| <b>25 weeks</b> | 8.7 $\pm$ 2.4<br>(n = 15)   | 12.6 $\pm$ 4.6<br>(n = 4)   | 0.137          | <b>6.5 <math>\pm</math> 1.8</b><br><b>(n = 20)</b>     | <b>62.2 <math>\pm</math> 26.6</b><br><b>(n = 9)</b> | <b>0.003</b><br><b>(**)</b> |
| <b>40 weeks</b> | 28.4 $\pm$ 7.4<br>(n = 16)  | 45.1 $\pm$ 17.7<br>(n = 12) | 0.455          | 29.1 $\pm$ 11.7<br>(n = 14)                            | 66.4 $\pm$ 34.4<br>(n = 7)                          | 0.075                       |
| <b>51 weeks</b> | 72.4 $\pm$ 22.3<br>(n = 16) | 72.6 $\pm$ 22.3<br>(n = 12) | 0.211          | 60.3 $\pm$ 21.7<br>(n = 16)                            | 51.7 $\pm$ 20.9<br>(n = 6)                          | 0.320                       |

### Supplementary Tables S3

#### Histopathological evaluation of WT and p38 $\delta$ -cKO<sup>AK</sup> skin tumors collected after 51 weeks of the DMBA/TPA chemical skin carcinogenesis regimen.

a) Incidence of malignant tumors: % (mice bearing malignant tumors) / (total mice)

| Incidence                                  | WT          | p38 $\delta$ -cKO <sup>AK</sup> |
|--------------------------------------------|-------------|---------------------------------|
| Mice with malignant tumors (SCC and/or KA) | 84% (16/19) | 47% * (9/19)                    |

\* cKO differs from WT at one-sided  $p < 0.05$  by Fisher's exact test.

b) Tumor Multiplicity at 51 weeks, Mean  $\pm$  s.e. Comparisons with significant p-values < 0.05 are highlighted in bold (p-values are shown in panel (c) below)

|              | Tumors per Animal Examined |                                   |                                   |                                   |
|--------------|----------------------------|-----------------------------------|-----------------------------------|-----------------------------------|
|              | WT                         |                                   | p38 $\delta$ -cKO <sup>AK</sup>   |                                   |
|              | M                          | F                                 | M                                 | F                                 |
| # examined   | 10                         | 9                                 | 8                                 | 11                                |
| SCC          | 0.70 $\pm$ 0.26            | 0.67 $\pm$ 0.17                   | 0.38 $\pm$ 0.18                   | 0.55 $\pm$ 0.21                   |
| KA           | 0.70 $\pm$ 0.26            | <b>0.44 <math>\pm</math> 0.18</b> | 0.75 $\pm$ 0.53                   | <b>0.00 <math>\pm</math> 0.00</b> |
| PAP          | 0.50 $\pm$ 0.27            | 0.33 $\pm$ 0.24                   | <b>1.00 <math>\pm</math> 0.38</b> | <b>0.18 <math>\pm</math> 0.12</b> |
| Seb.Ad       | 0.10 $\pm$ 0.10            | 0.11 $\pm$ 0.11                   | 0.00 $\pm$ 0.00                   | 0.00 $\pm$ 0.00                   |
| Mel          | 0.10 $\pm$ 0.10            | 0.33 $\pm$ 0.17                   | 0.00 $\pm$ 0.00                   | 0.00 $\pm$ 0.00                   |
| Total        | 2.10 $\pm$ 0.60            | <b>1.89 <math>\pm</math> 0.42</b> | 2.12 $\pm$ 0.85                   | <b>0.73 <math>\pm</math> 0.24</b> |
| Malignant    | 1.50 $\pm$ 0.40            | <b>1.44 <math>\pm</math> 0.29</b> | 1.12 $\pm$ 0.61                   | <b>0.55 <math>\pm</math> 0.21</b> |
| Benign       | 0.60 $\pm$ 0.34            | 0.44 $\pm$ 0.24                   | <b>1.00 <math>\pm</math> 0.38</b> | <b>0.18 <math>\pm</math> 0.12</b> |
|              |                            |                                   |                                   |                                   |
| # Tumor-free | 2                          | 1                                 | 2                                 | 5                                 |

c) One-sided Mann-Whitney p-values for tumor multiplicities listed in (b); significant p-values < 0.05 are highlighted in bold. SCC, squamous cell carcinoma; KA, keratoacanthoma; PAP, papilloma; Seb.Ad., Sebaceous adenoma; Mel, melanoma; Malign., malignant.

| Tumors per Animal Examined |                          | SCC   | KA           | PAP          | Seb. Ad. | Mel   | Total        | Malign.      | Benign       |
|----------------------------|--------------------------|-------|--------------|--------------|----------|-------|--------------|--------------|--------------|
| <b>Males</b>               | <b>cKO vs. WT</b>        | 0.272 | 0.289        | 0.145        | 0.556    | 0.556 | 0.448        | 0.169        | 0.167        |
| <b>Females</b>             | <b>cKO vs. WT</b>        | 0.311 | <b>0.026</b> | 0.421        | 0.450    | 0.074 | <b>0.019</b> | <b>0.017</b> | 0.276        |
| <b>cKO</b>                 | <b>Males vs. Females</b> | 0.422 | 0.164        | <b>0.035</b> | 1.000    | 1.000 | 0.102        | 0.345        | <b>0.035</b> |
| <b>WT</b>                  | <b>Males vs. Females</b> | 0.459 | 0.322        | 0.444        | 0.737    | 0.249 | 0.527        | 0.461        | 0.500        |

### Supplementary Table S4

#### Incidence of malignant tumors in WT and p38 $\delta$ -cKO $^{\Delta M}$ males at 51 weeks post-DMBA.

% (mice bearing malignant tumors) / (total mice)

| Incidence                                     | WT Males  | p38 $\delta$ -cKO $^{\Delta M}$ Males |
|-----------------------------------------------|-----------|---------------------------------------|
| Mice with malignant tumors<br>(SCC and/or KA) | 78% (7/9) | 33% (4/12) <sup>#</sup>               |

# approaching significance at  $p = 0.0563$  by Fisher's exact test (one-sided)

## Supplementary Table S5

The expression of the genes linked to the Myeloid Leukocyte Activation gene category was significantly downregulated by p38 $\delta$  ablation in v-ras<sup>Ha</sup> transformed keratinocytes [1].

The following genes were downregulated:

| Gene Symbol | Ratio (p38 $\delta$ -KO vs Control) | Description                                                                         |
|-------------|-------------------------------------|-------------------------------------------------------------------------------------|
| SLC11A1     | -4.1                                | solute carrier family 11 (proton-coupled divalent metal ion transporters), member 1 |
| CPLX2       | -1.4                                | complexin 2                                                                         |
| FCGR2B      | -5.8                                | Fc receptor, IgG, low affinity IIb                                                  |
| SLC7A2      | -1.8                                | solute carrier family 7 (cationic amino acid transporter, y+ system), member 2      |
| TICAM1      | -1.7                                | toll-like receptor adaptor molecule 1                                               |
| SNCA        | -3.1                                | synuclein, alpha                                                                    |
| TGFBR2      | -3.1                                | transforming growth factor, beta receptor II                                        |
| MYO1F       | -4.6                                | myosin IF (unconventional class I myosin 1f)                                        |
| FCER1G      | -2.1                                | Fc receptor, IgE, high affinity I, gamma polypeptide                                |
| IRF4        | -1.9                                | interferon regulatory factor 4                                                      |
| FCGR3       | -3.3                                | Fc receptor, IgG, low affinity III (CD16)                                           |

### Reference:

1. Kiss, A.; Koppel, A.C.; Anders, J.; Cataisson, C.; Yuspa, S.H.; Blumenberg, M.; Efimova, T. Keratinocyte p38 $\delta$  loss inhibits Ras-induced tumor formation, while systemic p38 $\delta$  loss enhances skin inflammation in the early phase of chemical carcinogenesis in mouse skin. *Mol Carcinog* **2016**, *55*, 563–574.
